# Supplementary material for: Supercritical carbon dioxide extraction of β-carotene and α-tocopherol from pumpkin: a Box–Behnken design for extraction variables
Source: Royal Society of Chemistry journal article supplement (doi:10.1039/c6ay02862d), 2016-11-25
Supplement: c6ay02862d1.pdf [file c6ay02862d1.pdf]

Supplementary Information for:

**Supercritical carbon dioxide extraction of  $\beta$ -carotene and  $\alpha$ -tocopherol from pumpkin :A Box-Behnken design for extraction variables**

*Xiudong Wang,<sup>a</sup> Chen Wang,<sup>b</sup> Xianjun Zha,<sup>a</sup> Yanan Mei,<sup>b</sup> Jingxin Xia<sup>b</sup> and Zhen Jiao<sup>a,c,\*</sup>*

<sup>a</sup>School of Chemistry and Chemical Engineering, Southeast University, Nanjing 211189, China

<sup>b</sup>School of Chemistry and Chemical Engineering, Southeast University Chenxian college, Nanjing 210088, China

<sup>c</sup>Center for Nanobiotechnology, Joint Research Institute of Southeast University and Monash University, Suzhou 215123, China

**\*Corresponding author:**

A/Prof. Zhen Jiao, School of Chemistry and Chemical Engineering, Southeast University, Nanjing 211189, China

**Email:** [jjaozhen@seu.edu.cn](mailto:jjaozhen@seu.edu.cn)

**Supplementary Data**

Number of pages: 3

Number of figures: 2

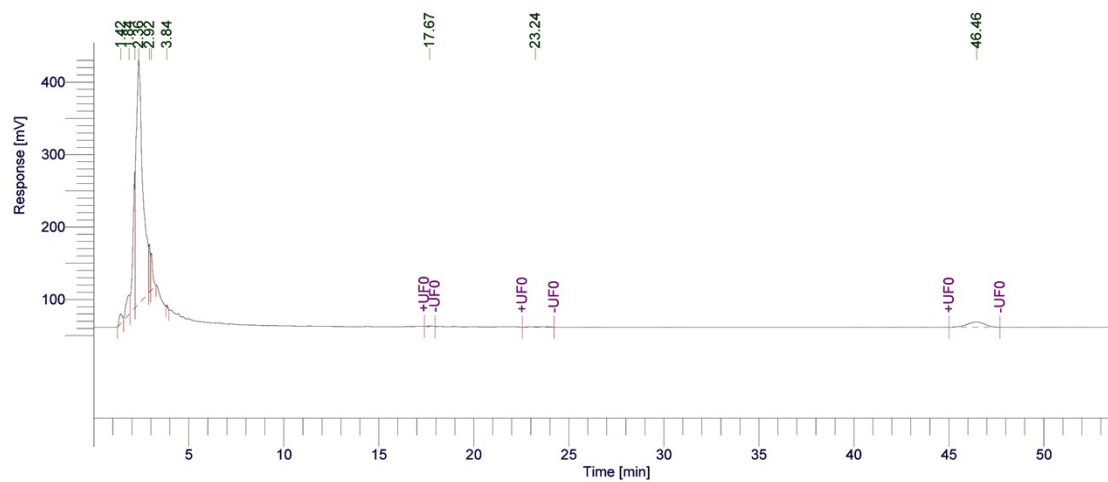

(a)

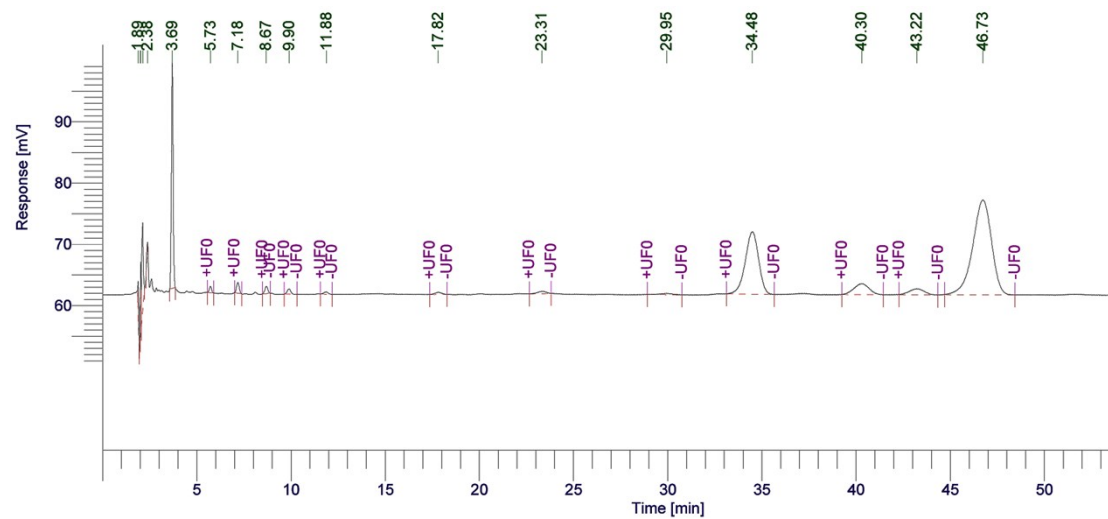

(b)

Fig. S1. HPLC chromatograms showing: (a) standard  $\beta$ -carotene, (b) extracts obtained by supercritical fluid extraction.

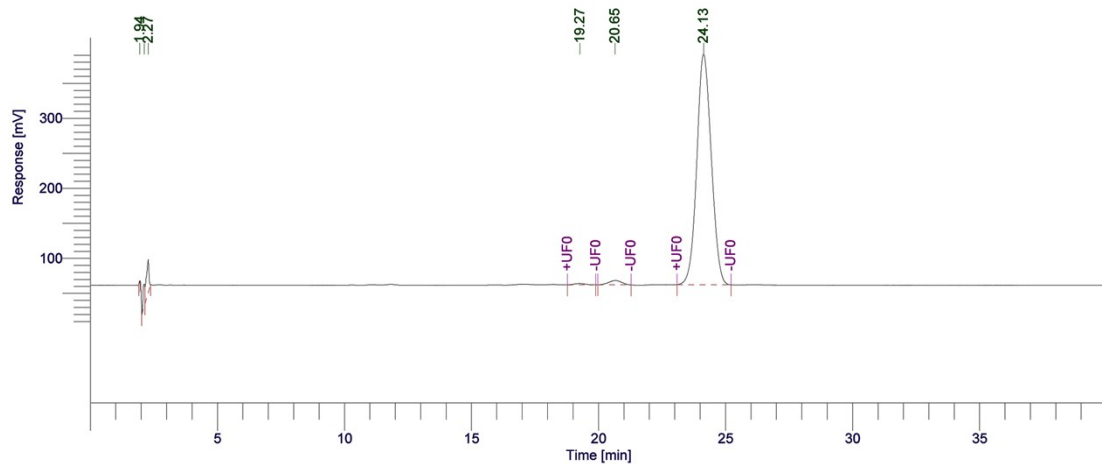

(a)

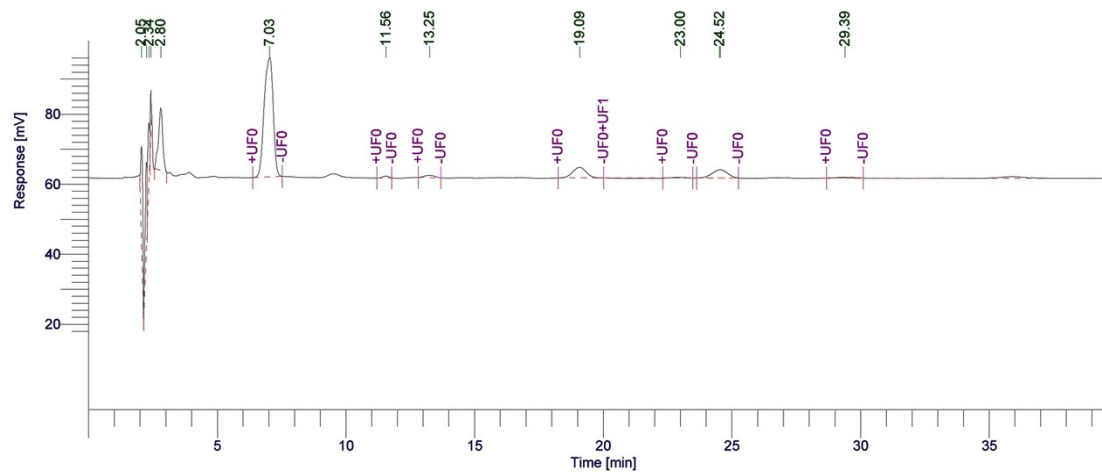

(b)

Fig. S2. HPLC chromatograms showing: (a) standard  $\alpha$ -tocopherol, (b) extracts obtained by supercritical fluid extraction.
